# Supplementary material for: Widespread gene-environment interactions shape the immune response to SARS-CoV-2 infection in hospitalized COVID-19 patients
Source: PubMed Central journal article supplement — bioRxiv. 2024 Dec 4:2024.12.03.626676. Preprint. [Version 1] doi: 10.1101/2024.12.03.626676 (PMC11642875; doi:10.1101/2024.12.03.626676), 2024-12-04
Supplement: NIHPP2024.12.03.626676v1-supplement-8.pdf [file NIHPP2024.12.03.626676v1-supplement-8.pdf]

713 **Supplementary materials:**

714 Materials and Methods

715 Figures S1-S4

716 Tables S1-S8

717

718 **Materials and Methods**

719 **Participants and samples.** We prospectively investigated hospitalized COVID-19 patients  
720 between April 2020 and December 2021 who initially presented with a symptomatic infection and  
721 positive SARS-CoV-2 nasopharyngeal swab polymerase chain reaction. All participants were  
722 admitted to the Centre Hospitalier de l'Université de Montréal (CHUM) and recruited into the  
723 Biobanque Québécoise de la COVID-19 (BQC19)<sup>56</sup>. Patients had no known prior exposure to  
724 SARS-CoV-2 (i.e., all infections were primary infections), were not vaccinated at the time of  
725 primary sampling (days after symptom onset [DSO]  $\leq 20$ ), and did not undergo plasma transfer  
726 therapy. Blood draws were performed during the acute phase of SARS-CoV-2 infection (defined  
727 as DSO  $\leq 20$  days, mean DSO = 12.1 days, DSO range = 6 - 20 days, n = 63 samples) and during  
728 various convalescent follow-up time points (defined as DSO  $> 20$  days, mean DSO = 128.8 days,  
729 DSO range = 31 - 370 days) for a subset of individuals sampled during the acute phase (n = 39  
730 samples). Additionally, PBMCs collected prior to the COVID-19 pandemic from healthy control  
731 individuals living in Montréal, Canada (n = 18 samples) were processed for single-cell data  
732 collection in parallel with infected patient samples. We also computationally integrated a set of  
733 publicly available healthy controls (n = 90 individuals) described in Randolph et al. (2021)<sup>4</sup>, which  
734 is detailed below ("Single-cell RNA-sequencing data processing and integration"). The study was  
735 approved by the respective IRBs (multicentric protocol: MP-02-2020-8929 for BQC19  
736 participants; CHUM protocol 19.387 for control individuals) and written, informed consent was  
737 obtained from all participants or, when incapacitated, their legal guardian before enrollment and  
738 sample collection.

739

740 **DNA sequencing and imputation.** DNA was extracted from whole blood using the Chemagic™  
741 DNA Blood 400 H96 kit (Perkin Elmer, CMG-1091). SNP genotyping was conducted using the  
742 Axiom™ Precision Medicine Research Array from Applied Biosystems (Applied Biosystems,  
743 902981) per the manufacturer's instructions. The array was processed using the GeneTitan™  
744 Multi-Channel instrument (Applied Biosystems). All samples were grouped with the Axiom  
745 Analysis Suite 5.1.1 software, and the "Best Practice Workflow" was performed using the  
746 following high-quality call rate parameters: Axiom\_PMRA.r3 library and threshold configuration  
747 Human.v5 with minimum call rate of 97.0%. Marker quality control tests were performed on a  
748 subset of ancestrally homogeneous participants, who were determined via comparison to 2,504  
749 individuals across 5 super populations from the 1000 Genomes Project Phase 3 data<sup>57</sup>. Batch effect  
750 quality control and replicate discordance checks were performed, and variants that failed either  
751 test were removed. Only single nucleotide variants with single character allele-codes (A, C, G, or  
752 T) (PLINK --snps-only 'just-acgt' option) were retained. Additionally, variants with low allele  
753 frequencies (minor allele frequency [MAF] < 0.001), low genotyping call rates (marker-wise  
754 missingness < 0.01), a deviation from Hardy-Weinberg equilibrium (HWE) (p-value < 1x10<sup>-6</sup>),  
755 and positioned in regions of high link disequilibrium (LD) were removed.

756 Sample quality filtering was performed considering the set of filtered genotypes described  
757 above. Outlier samples with a high genotype missingness rate (overall missing genotype rate >  
758 0.04) or high/low principal component corrected heterozygosity rate on autosomal chromosomes  
759 (> ±3SD, respectively) were considered low quality and removed. Sex chromosome composition  
760 was determined by estimating X chromosome marker heterozygosity using PLINK (--check-sex  
761 0.4 0.7). Individuals with discordant self-reported sex and genetic sex were removed prior to  
762 genotype imputation. All other samples that passed quality control filters were used for imputation.

763 Genotype phasing and imputation was performed using the Michigan Imputation Server<sup>58</sup> with the  
764 TOPMed reference panel<sup>59</sup>. After imputation, variants with a posterior genotype probability (GP)  
765 < 90% were set to missing within each individual using QCTOOL (v2.0.7, -threshold 0.9 filter).

766

767 **Whole blood processing.** At the time of sampling, whole blood was collected in up to three tubes  
768 containing acid citrate dextrose (ACD) and processed within 6 hours of collection. Blood from the  
769 same donor was pooled and centrifuged at 400 g for 10 min at room temperature (RT). After  
770 centrifugation, plasma was collected, aliquoted, and stored at -80°C. The remaining blood was  
771 topped up to 30 ml with HBSS medium at RT. Ficoll-Paque separation was then used to isolate  
772 PBMCs. PBMCs were washed with R+ (RPMI 1640 + 0.1M HEPES + 20 U/ml Penicillin-  
773 Streptomycin), resuspended in 5 ml R+ with 10% fetal bovine serum (FBS), and counted with  
774 Trypan blue. Cells were spun down at 400 g for 10 min at 4°C and resuspended in cold FBS at 20  
775 M/ml. A freezing solution of FBS with 20% DMSO was added drop-by-drop to the cell suspension  
776 while the tube was continuously agitated. Cell suspensions were transferred into cryovials (1  
777 ml/vial), immediately placed into Mr. Frosty Freezing Containers, and stored at -80°C. The  
778 following day, PBMCs were transferred to liquid nitrogen for long-term storage.

779

780 **Sample processing for single-cell RNA-sequencing.** PBMCs were thawed in groups of 3 to 4  
781 samples (processing batch 1) or 16 to 19 samples (processing batch 2), rested for 2 hours in RPMI  
782 1640 supplemented with 10% FBS (Corning, MT35015CV), 2 mM L-glutamine (ThermoFisher  
783 Scientific, 25-030-081), and 10 ug/ml gentamicin (ThermoFisher Scientific, 15710064), and  
784 subsequently processed for single-cell collection. Cells from different samples were pooled per  
785 processing batch for a total of 29 multiplexed sample batches (n = 124 samples). For each

786 multiplexed cell pool, 12,000 cells were targeted for collection using the Chromium Next GEM  
787 Single Cell 3' Reagent (v3.1 Dual Index chemistry) kit (10x Genomics, 1000268). After GEM  
788 generation, the reverse transcription (RT) reaction was performed in a thermal cycler as described  
789 (53°C for 45 min, 85°C for 5 min), and post-RT products were stored at -20°C for up to one week  
790 until downstream processing.

791  
792 **Single-cell RNA-sequencing library preparation and sequencing.** Post-RT reaction cleanup,  
793 cDNA amplification and sequencing library preparation were performed as described in the Single  
794 Cell 3' Reagent Kits v3.1 (Dual Index) User Guide (10x Genomics). Briefly, cDNA was cleaned  
795 with DynaBeads MyOne SILANE beads (ThermoFisher Scientific, 37002D) and amplified in a  
796 thermal cycler using the following program: 98°C for 3 min, [98°C for 15 s, 63°C for 20 s, 72°C  
797 for 1 min] x 11 cycles, 72°C 1 min. After cleanup with the SPRIselect reagent kit (Beckman  
798 Coulter, B23317), libraries were constructed by performing the following steps: fragmentation,  
799 end-repair, A-tailing, double-sided SPRIselect cleanup, adaptor ligation, SPRIselect cleanup,  
800 sample index PCR (98°C for 45 s, [98°C for 20 s, 54°C for 30 s, 72°C for 20 s] x 14 cycles, 72°C  
801 1 min), and double-sided SPRIselect size selection. Prior to sequencing, all multiplexed single-cell  
802 libraries were quantified using the KAPA Library Quantification Kit for Illumina Platforms  
803 (Roche, 50-196-5234). For each processing batch (n = 2), libraries were pooled in an equimolar  
804 ratio and sequenced 100 base pair paired-end on an Illumina NovaSeq 6000 (processing batch 1  
805 average mean reads per cell = 48,613, average median genes detected per cell = 1,627; processing  
806 batch 2 average mean reads per cell = 59,246, average median genes detected per cell = 2,007).

807

808 **Single-cell RNA-sequencing data processing and integration.** FASTQ files from each  
809 multiplexed capture library were mapped to the pre-built GRCh38 human reference transcriptome  
810 (downloaded 10x Genomics) using the cellranger (v6.0.2) count function<sup>60</sup>. souporecell (v2.0,  
811 Singularity v3.4.0)<sup>61</sup> in --skip\_remap mode was used to demultiplex cells into samples based on  
812 genotypes from a common variants file (1000 Genomes Project samples filtered to SNPs with  $\geq$   
813 2% allele frequency in the population, downloaded from <https://github.com/wheaton5/souporcell>).  
814 For each sample batch, hierarchical clustering of the known genotypes obtained from DNA-  
815 sequencing and cluster genotypes estimated by souporecell was used to assign individuals to  
816 souporecell cell clusters. All samples except for three were successfully demultiplexed; samples  
817 unable to be confidently assigned to a set of cells were removed (n samples retained = 121). After  
818 demultiplexing, Seurat (v4.3.0, R v4.0.3)<sup>62</sup> was used to perform cell-level quality control filtering.  
819 One sample was removed due to a very low number of cells captured (n = 20 cells total), leaving  
820 a total of 120 samples. High-quality cells were retained for downstream analysis if they had: 1) a  
821 “singlet” status called by souporecell, 2) between 500 – 4000 genes detected (nFeature\_RNA), 3) a  
822 mitochondrial UMI percentage < 20%, and 4) less than 25,000 total molecules (nCount\_RNA),  
823 leaving 236,143 cells. Gene filtering was performed using the CreateSeuratObject min.cells  
824 parameter, in which only genes present in at least five cells were kept (n = 30,986 genes).

825       Due to the large discrepancy between the number of cells assayed in healthy control  
826 individuals (n = 38,663) versus acute and convalescent samples (n = 197,480) in our dataset, we  
827 integrated a publicly available set of high-quality cells derived from control, non-infected  
828 individuals (n = 124,976 cells, 90 samples) described in Randolph et al., (2021)<sup>4</sup>, hereafter referred  
829 to as the “non-infected IAV controls”. First, we removed IAV-derived transcripts (n = 10 genes)  
830 from the raw count matrix of the non-infected IAV controls. Next, we merged all datasets, split

831 the resulting Seurat object by dataset (“COVID batch1”, “COVID batch2” or “IAV controls”), and  
832 ran SCTransform<sup>63</sup> to normalize and scale the UMI counts within dataset. We simultaneously  
833 regressed out variables corresponding to experiment batch, percent mitochondrial UMIs per cell,  
834 and individual label in all datasets, and additionally, regressed out sampling time point (e.g.,  
835 control, acute, follow-up) in the COVID data. We then integrated the three datasets together using  
836 the SelectIntegrationFeatures, PrepSCTIntegration, FindIntegrationAnchors, and IntegrateData  
837 framework<sup>62</sup>. After integration, dimensionality reduction was performed via UMAP (RunUMAP  
838 function, dims = 1:30) and PCA (RunPCA function, npcs = 30). A Shared Nearest Neighbor Graph  
839 was constructed using the FindNeighbors function (dims = 1:20, all other parameters set to  
840 default), and clusters were subsequently called using the FindClusters algorithm (resolution = 0.5,  
841 all other parameters set to default)<sup>62</sup>. In total, our integrated dataset consisted of 361,119 high-  
842 quality cells across all samples (n = 236,143 from the combined COVID datasets, n = 124,976  
843 from the non-infected IAV dataset, n = 208 samples altogether).

844

845 **Cell type assignment.** We performed cell type annotation via label transfer to map cell type  
846 information onto our data. To perform the label transfer, we downloaded a multimodal human  
847 PBMC reference dataset derived from scRNA-seq paired with CITE-seq as described in Hao et  
848 al.<sup>15</sup>. We followed the Seurat v4 Reference Mapping workflow, consisting of the  
849 FindTransferAnchors and MapQuery functions, with the Hao et al. reference dataset used as our  
850 reference UMAP and the following parameters: normalization.method = “SCT” and  
851 reference.reduction = "spca". These fine-scale populations were then collapsed into the following  
852 broad super populations encompassing the six major cell types found in PBMCs using the  
853 predicted.celltype.l2 definitions derived from Hao et al.: CD4<sup>+</sup> T cells = c("CD4 CTL", "CD4

854 Naive", "CD4 Proliferating", "CD4 TCM", "CD4 TEM", "Treg"), CD8<sup>+</sup> T cells = c("CD8 Naive",  
855 "CD8 Proliferating", "CD8 TCM", "CD8 TEM"), NK cells = c("NK", "NK Proliferating",  
856 "NK\_CD56bright"), CD14<sup>+</sup> monocytes = "CD14\_monocytes", CD16<sup>+</sup> monocytes =  
857 "CD16\_monocytes", and B cells = c("B intermediate", "B memory", "B naive"). In total, we  
858 annotated 342,127 high-quality cells falling into the major PBMC populations across all  
859 individuals and conditions (n CD4<sup>+</sup> T cells = 153,479, CD8<sup>+</sup> T cells = 53,562, CD14<sup>+</sup> monocytes  
860 = 70,060, CD16<sup>+</sup> monocytes = 5,446, B cells = 34,805, NK cells = 24,775).

861

862 **Calculation of pseudobulk estimates.** Pseudobulk estimates were used to summarize single-cell  
863 expression values into bulk-like expression estimates within samples. This was performed for all  
864 six major cell types (CD4<sup>+</sup> T cells, CD8<sup>+</sup> T cells, B cells, CD14<sup>+</sup> monocytes, CD16<sup>+</sup> monocytes,  
865 NK cells). Within each cell type cluster for each sample, raw UMI counts were summed across all  
866 cells assigned to that sample for each gene using the `sparse_Sums` function in `textTinyR` (v1.1.3)  
867 (<https://cran.r-project.org/web/packages/textTinyR/textTinyR.pdf>), yielding an n x m expression  
868 matrix, where n is the number of samples included in the study (n = 208) and m is the number of  
869 genes detected in the single-cell analysis (m = 30,986) for each of the 6 clusters.

870

871 **Calculation of residuals for modeling.** For each cell type, lowly-expressed genes were filtered  
872 using cell type-specific cutoffs (removed if they had a median logCPM < 1.0 in CD14<sup>+</sup> monocytes,  
873 < 1.5 in CD4<sup>+</sup> T cells, < 2.0 in B cells and CD8<sup>+</sup> T cells, < 2.5 in CD16<sup>+</sup> monocytes, and < 3.0 in  
874 NK cells), leaving the following number of genes per cell type: CD4<sup>+</sup> T cells = 10,337, CD8<sup>+</sup> T  
875 cells = 10,036, B cells = 10,179, CD14<sup>+</sup> monocytes = 10,882, CD16<sup>+</sup> monocytes = 9,398, and NK  
876 cells = 9,882. Within each cell type, only samples with  $\geq 5$  cells per sample were kept for



877 downstream modeling. Further, three samples were removed for downstream analysis because they  
878 consistently clustered as outliers on gene expression PCAs for multiple cell types (one COVID-19  
879 patient at the acute infection time point and two non-infected IAV controls), leaving the following  
880 number of samples per cell type:

| Cell type                   | N healthy controls | N patients | N follow-ups |
|-----------------------------|--------------------|------------|--------------|
| B                           | 106                | 63         | 38           |
| CD4 <sup>+</sup> T          | 106                | 63         | 39           |
| CD8 <sup>+</sup> T          | 106                | 63         | 39           |
| CD14 <sup>+</sup> monocytes | 106                | 63         | 39           |
| CD16 <sup>+</sup> monocytes | 47                 | 44         | 39           |
| NK                          | 63                 | 63         | 39           |

881  
882 After removing lowly-expressed genes, normalization factors to scale the raw library sizes were  
883 calculated using `calcNormFactors` in `edgeR` (v 3.26.8)<sup>64</sup>. The `voom` function in `limma` (v3.40.6)<sup>65</sup>  
884 was used to apply these size factors, estimate the mean-variance relationship, and convert raw  
885 pseudocounts to logCPM values. The inverse variance weights calculated by `voom` were obtained  
886 and included in the respective `lmFit` call for all downstream models unless otherwise noted<sup>65</sup>.

887  
888 **Calculation of per-individual ssGSEA scores.** To construct the ssGSEA Hallmark pathway  
889 scores, we calculated single sample Gene Set Enrichment Analysis (ssGSEA) scores from the  
890 pseudobulk COVID-19 patient logCPM gene expression estimates corrected for age, sex, dataset,  
891 and the number of cells for a given cell type collected per sample using the Gene Set Variation  
892 Analysis (GSVA, v1.32.0) package in R with default parameters and `method = "ssgsea"`<sup>66</sup>. ssGSEA

893 is a method that allows you to summarize gene expression patterns for any desired target gene set,  
894 and for each sample, it will return a score representative of that gene set. These scores were  
895 calculated per cell type, and for each of the pathway-specific ssGSEA scores, the input gene set  
896 was derived from either a Hallmark or Gene Ontology (GO) Biological Process gene set<sup>22</sup>. The  
897 following gene sets were used to define the per-sample pathway scores: (1) inflammatory response  
898 score – Hallmark inflammatory response pathway, (2) TNF- $\alpha$  score – Hallmark TNF- $\alpha$  signaling  
899 via NF- $\kappa$ B pathway, (3) oxidative phosphorylation score – Hallmark Oxidative phosphorylation  
900 pathway, and (4) antigen processing score – GO Biological Process antigen processing and  
901 presentation pathway.

902

903 **Modeling SARS-CoV-2 infection effects.** Only healthy controls and COVID-19 patients sampled  
904 during the primary infection time point were retained for modeling of infection effects (i.e., follow-  
905 up samples were excluded). The following linear model was used to identify genes differentially  
906 expressed between healthy control individuals and COVID-19 patients:

907

908

$$E(i,j) \sim \begin{cases} \beta_0(i) + \beta_{age}(i) \cdot age(j) + \beta_{sex}(i) \cdot sex(j) + \beta_{dataset}(i) \cdot dataset(j) + \\ \beta_{counts}(i) \cdot counts(j) + \varepsilon^{ctl}(i,j) \text{ if condition} = \text{ctl} \\ \\ \beta_0(i) + \beta_{COVID}(i) + \beta_{age}(i) \cdot age(j) + \beta_{sex}(i) \cdot sex(j) + \\ \beta_{dataset}(i) \cdot dataset(j) + \beta_{counts}(i) \cdot counts(j) + \varepsilon^{COVID}(i,j) \text{ if condition} = \text{COVID} \end{cases}$$

909

910 Here,  $E(i,j)$  represents the expression estimate of gene  $i$  for individual  $j$ ,  $\beta_0(i)$  is the global intercept  
911 accounting for the expected expression of gene  $i$  in a non-infected female measured in the COVID  
912 batch 1 dataset, and  $\beta_{COVID}(i)$  represents the global estimate of the effect of SARS-CoV-2 infection  
913 in patients per gene. Age represents the mean-centered, scaled (mean = 0, sd = 1) age per

914 individual, with  $\beta_{age}(i)$  being the effect of age on expression levels, sex represents the self-  
915 identified sex for each individual (factor levels = “Female”, “Male”), with  $\beta_{sex}(i)$  capturing the  
916 effect of sex on expression, dataset represents the dataset in which the sample was obtained (factor  
917 levels = "COVID batch 1", "COVID batch 2", "IAV controls"), with  $\beta_{dataset}(i)$  capturing the dataset  
918 effect, and counts represents the number of cells captured within that cell type for sample  $j$ , with  
919  $\beta_{counts}(i)$  capturing the effect of cell number on expression. Finally,  $\varepsilon^{cdt}$  represents the residuals for  
920 each respective condition (control or COVID) for each gene  $i$ , individual  $j$  pair. The model was fit  
921 using the `lmFit` and `eBayes` functions in `limma`<sup>65</sup>, and the estimates of the global infection effect  
922  $\beta_{COVID}(i)$  (i.e., the differential expression effects due to SARS-CoV-2 infection) were extracted  
923 across all genes along with their corresponding p-values. We controlled for false discovery rates  
924 (FDR) using an approach analogous to that of Storey and Tibshirani<sup>2,67</sup>, which derives the  
925 distribution of the null model empirically. To obtain a null, we performed 10 permutations, where  
926 infection status label (i.e., control/COVID) was permuted across individuals. We considered genes  
927 significantly differentially expressed upon infection if they had  $\beta_{COVID} |\log_2FC| > 0.5$  and an FDR  
928  $< 0.05$ .

929

930 **Modeling COVID-19 disease severity effects within patients.** To model the effect of COVID-  
931 19 disease severity on gene expression, we restricted our analyses to COVID-19 patients sampled  
932 during the primary infection time point for which we had information about disease severity (n =  
933 63). Disease severity was assessed using a five-point scale of respiratory support needed at the  
934 time of patient sampling that includes the following categories: 0-Moderate = no supplemental  
935 oxygen (n = 16); 1-Severe = nasal cannula (n = 17); 2-Critical = non-invasive ventilation (n = 9);  
936 3-Critical = intubation (n = 20); 4-Critical = extracorporeal membrane oxygenation (ECMO) (n =

937 1). The following model was used to evaluate the effect of severity at the time of patient sampling  
938 on expression:

$$939 \quad E(i,j) \sim \beta_0(i) + \beta_{severity}(i) \cdot severity(j) + \beta_{age}(i) \cdot age(j) + \beta_{sex}(i) \cdot sex(j) + \beta_{BMI}(i) \cdot BMI(j) + \\ 940 \quad \beta_{dataset}(i) \cdot dataset(j) + \beta_{counts}(i) \cdot counts(j) + \varepsilon(i,j)$$

941 Here,  $E(i,j)$  represents the expression estimate of gene  $i$  for individual  $j$ ,  $\beta_0(i)$  is the global intercept  
942 accounting for the expected expression of gene  $i$  in a female COVID-19 patient, and  $\beta_{severity}(i)$   
943 indicates the effect of severity on gene  $i$  during the primary sampling time point. Severity  
944 ( $severity(j)$ ) represents respiratory support score per individual and was treated as a numeric  
945 variable. Body mass index (BMI) represents the mean-centered, scaled (mean = 0, sd = 1) BMI  
946 per individual, with  $\beta_{BMI}(i)$  being the effect of BMI on expression levels. If BMI was not reported  
947 for an individual (n missing = 26), this missing data was filled with the average BMI across  
948 patients. All other terms in the model are equivalent to that described in “Modeling SARS-CoV-2  
949 infection effects”. The model was fit using the `lmFit` and `eBayes` functions in `limma`<sup>65</sup>, and the  
950 estimates of  $\beta_{severity}(i)$  were extracted across all genes along with their corresponding p-values.  
951 We again controlled for false discovery rates (FDR) by empirically deriving the null distribution.  
952 To obtain a null, we performed 10 permutations, where respiratory support score (i.e., 0 - 5) was  
953 permuted across patients. We considered genes significantly correlated with disease severity if  
954 they had an FDR < 0.05.

955

956 **Gene set enrichment analyses.** The R package `fgsea` (v1.10.1)<sup>68</sup> was used to perform gene set  
957 enrichment analysis for the severity effects using the H hallmark gene sets<sup>23</sup>. Ranked t-statistics  
958 for each cell type were obtained directly from the `topTable` function in `limma`<sup>65</sup>, and the  
959 background set for a cell type was the set of genes sufficiently expressed (i.e., passed the lowly-

960 expressed gene filter threshold) for that cell type. Pre-ranked t-statistics were used to perform the  
961 enrichment using fgsea with the following parameters: minSize = 15, maxSize = 500, nperm =  
962 100,000. Normalized enrichment scores (NES) and Benjamini-Hochberg adjusted p-values  
963 output by fgsea were collected for each analysis.

964

965 **eQTL mapping and integration with mashr.** eQTL mapping was performed for each cell type  
966 using the pseudobulk expression data. A linear regression model was used to ascertain associations  
967 between SNP genotypes and expression levels. Input expression matrices were quantile-  
968 normalized within each set of disease state samples (i.e., healthy controls, acute COVID-19  
969 patients, and follow-ups) prior to association testing. eQTL were mapped separately for each  
970 disease state using the R package MatrixEQTL (v2.3)<sup>69</sup>. Prior to mapping, SNPs were filtered  
971 using the following criteria in our COVID-19 dataset and the Randolph et al. dataset separately:  
972 1) keep those with a minor allele frequency > 5% across all individuals, 2) exclude those with >  
973 10% of missing data, and 3) exclude those that deviate from Hardy-Weinberg equilibrium at  $p <$   
974  $10^{-5}$  (`--maf 0.05 --geno 0.10 --hwe 0.00001 PLINK v1.9 filters`)<sup>70</sup>. Only SNPs that passed these  
975 filters and were present in both datasets were retained and merged across datasets ( $n = 4,194,100$   
976 SNPs kept). Local associations (i.e., putative *cis*-eQTL) were tested against all SNPs located  
977 within the gene body and 100 kilobases upstream and downstream of the transcription start site  
978 (TSS) and transcription end site (TES) for each gene tested.

979       Within our follow-up samples, some individuals were sampled multiple times during the  
980 convalescent period. To avoid counting these genetically duplicate samples more than once when  
981 eQTL mapping, we downsampled the follow-ups to include only a single sample with DSO > 20  
982 per individual. For each individual with multiple follow-up time points, we chose to keep the

983 sample with the maximum DSO, which dropped our sample size from  $n = 39$  to  $n = 26$ . This  
984 duplicate sampling structure was not present in the healthy control or acute COVID-19 samples,  
985 so the full sample set was used to map eQTL for these disease states.

986 We accounted for unmeasured surrogate confounders by performing PCA on a correlation  
987 matrix based on the gene expression data. Subsequently, up to 15 principal components (PCs) were  
988 regressed out prior to performing the association analysis for each gene. A specific number of PCs  
989 to regress in each cell type-disease state pair, corresponding to the number of PCs that led to the  
990 detection of the largest number of eQTL in each condition, was then chosen empirically (Table  
991 S8). To avoid spurious associations resulting from population structure, the first two eigenvectors  
992 obtained from a PCA on the genotype data using SNPRelate (v1.20.1, gdsfmt v1.22.0)<sup>71</sup> were  
993 included in the linear model. Other covariates included were age (mean-centered, scaled), sex,  
994 number of cells detected per sample, and dataset.

995 To gain power to detect *cis*-eQTL effects, we implemented mashr<sup>25</sup>, which leverages  
996 sharing information across cell types and disease states. We considered a set of shared genes that  
997 were expressed across all cell types ( $n = 7,646$ ). For each of these genes, we chose the single top  
998 *cis*-SNP, defined as the SNP with the lowest FDR across all cell types ( $n = 6$ ) in the acute COVID-  
999 19 patient condition, to input into mashr. We extracted the effect sizes and computed the standard  
1000 errors of these betas from the Matrix eQTL outputs for each gene-SNP pair across cell types and  
1001 conditions. We defined a set of strong tests (i.e., the 7,646 top gene-SNP associations) as well as  
1002 a set of random tests, which we obtained from randomly sampling 200,000 rows of a matrix  
1003 containing all gene-SNP pairs tested merged across conditions. The mashr workflow was as  
1004 follows: i) the correlation structure among the null tests was learned using the random test subset,  
1005 ii) the data-driven covariance matrices were learned using the strong test subset (from 5 PCs), iii)

1006 the mash model was fit to the random test subset using canonical and data-driven covariance  
1007 matrices, and iv) the posterior summaries were computed for the strong test subset. We used the  
1008 local false sign rate (lfsr) to assess significance of our posterior eQTL effects and considered a  
1009 gene-SNP pair to have a significant eQTL effect if the lfsr was  $< 0.10$ .

1010

1011 **Calculation of functional cell state scores per cell.** To obtain the cell state scores used for  
1012 modeling cell state-dependent single-cell eQTL, first, the raw single-cell UMI counts across all  
1013 samples were obtained per cell type. All subsequent processing steps were performed for each cell  
1014 type independently. Raw cell counts in the form of a Seurat object were split by dataset, and  
1015 SCTransform was used to normalize and scale the UMI counts within dataset, regressing the  
1016 effects of experiment batch, percent mitochondrial UMIs per cell, and age in all datasets, and  
1017 additionally, sex in the COVID batch 1 and batch 2 datasets. The SelectIntegrationFeatures,  
1018 PrepSCTIntegration, FindIntegrationAnchors, and IntegrateData pipeline was then used to  
1019 integrate cells, returning all features following integration (features.to.integrate = all\_features)<sup>60</sup>.  
1020 The scaled data matrix (@scale.data slot) of the integrated data, which holds the residuals of the  
1021 corrected log-normalized integrated counts, was obtained, and these values were used to calculate  
1022 ssGSEA scores (using the same parameters described above in “Calculation of per-individual  
1023 ssGSEA scores”) per cell for our pathways of interest. Here, we applied ssGSEA to the full scaled  
1024 SCTransform gene  $\times$  cell matrix, allowing us to generate cell state scores for each single cell in the  
1025 dataset. Our pathways of interest included the following immune-related and metabolism-related  
1026 pathways in the MSigDB Hallmark gene sets ( $n = 6$ )<sup>22</sup>: Apoptosis, Inflammatory response,  
1027 Interferon- $\alpha$  response, Interferon- $\gamma$  response, Oxidative phosphorylation, and TNF- $\alpha$  signaling via  
1028 NF- $\kappa$ B.

1029

1030 **Modeling cell state-genotype interaction effects.** We used a poisson mixed effects model to test  
1031 for cell state-dependent eQTL because this model has previously been used to detect significant  
1032 cell state-genotype interaction effects in single-cell data<sup>7</sup>. Only COVID-19 patients sampled  
1033 during the primary infection time point were included in these analyses (n = 63). Single-cell eQTL  
1034 modeling was performed independently in each cell type; for each cell type, we tested the gene-  
1035 SNP pairs for which we had evidence of a significant eQTL ( $lfsr < 0.10$ ) within patients in the  
1036 pseudobulk eQTL analysis (n genes: B cells = 1,395, CD4<sup>+</sup> T cells = 1,804, CD8<sup>+</sup> T cells = 1,508,  
1037 CD14<sup>+</sup> monocytes = 2,084, CD16<sup>+</sup> monocytes = 1,410, NK cells = 1,523). For CD4<sup>+</sup> T cells, we  
1038 downsampled the number of cells prior to constructing the model inputs to 60,000 cells due to  
1039 vector size constraints in R. To control for genetic background and latent confounders, we included  
1040 both genotype and expression PCs in our cell state eQTL models. We computed genotype PCs  
1041 using the same approach as above in “eQTL mapping and integration with mashr”. Expression  
1042 PCs were calculated from non-batch corrected integrated and scaled counts using the same method  
1043 as described in “Calculation of functional state scores per cell,” but omitting the batch correction  
1044 step (i.e., no variables were regressed in the SCTransform call). PCA was run on the cell  $\times$  gene  
1045 matrix of non-corrected integrated and scaled counts subset on the top 3,000 variable features  
1046 using the `prcomp_irlba` function in the R package `irlba` (v2.3.5.1)<sup>72</sup>.

1047 To test for interactions with cell state, we used the following poisson mixed effects  
1048 interaction model, where each gene’s UMI counts were modeled as a function of genotype as well  
1049 as additional donor-level and cell-level covariates. For each gene:

1050

1051



$$\begin{aligned}
 1052 \quad \log(E_i) &\sim \beta_0 + \beta_G X_{d,G} + \beta_{dataset} X_{d,dataset} + \beta_{age} X_{d,age} + \beta_{sex} X_{d,sex} + \beta_{nUMI} \log(X_{i,nUMI}) \\
 1053 \quad &+ \beta_{MT} X_{i,MT} + \sum_{k=1}^3 \beta_{gPC_k} X_{d,gPC_k} + \sum_{k=1}^5 \beta_{ePC_k} X_{i,ePC_k} + \beta_{cell\ state} X_{i,cell\ state} \\
 1054 \quad &+ \beta_{G \times cell\ state} X_{d,G} X_{i,cell\ state} + (\phi_d | d) + (\kappa_b | b) + \varepsilon
 \end{aligned}$$

1055 Here,  $E$  is the expression of the gene in cell  $i$ ,  $\beta_0$  is the intercept, and  $\varepsilon$  represents the residuals. All  
 1056 other  $\beta$ s represent fixed effects for various covariates in cell  $i$ , donor  $d$ , or experimental batch  $b$  as  
 1057 follows:  $G$  = genotype at the eQTL variant,  $dataset$  = dataset from which sample originates,  $age$  =  
 1058 scaled age of donor,  $sex$  = sex of donor,  $nUMI$  = number of UMI per cell (accounts for sequencing  
 1059 depth),  $MT$  = percent of mitochondrial UMIs per cell,  $gPC$  = genotype PCs,  $ePC$  = single-cell  
 1060 expression PCs prior to batch correction, and  $cell\ state$  = functional cell state score per cell  
 1061 (described above). Donor was modeled as a random individual effect ( $\phi_d | d$ ) to account for the  
 1062 fact that multiple cells were sampled per individual, and experimental batch was also modeled as  
 1063 a random effect ( $\kappa_b | b$ ). Finally,  $\beta_{G \times cell\ state} X_{d,G} X_{i,cell\ state}$  represents the cell state x genotype  
 1064 interaction term of interest.  
 1065

1066 Single-cell poisson mixed interaction models were fit using the `glmer` function in the `lme4`  
 1067 R package (v 1.1-29) with the following parameters: `family = "poisson"`, `nAGQ = 0`, and `control`  
 1068 `= glmerControl(optimizer = "nloptwrap")`<sup>73</sup>. To determine significance, we used a likelihood ratio  
 1069 test (LRT) comparing two models, one with and one without the cell state interaction term and  
 1070 calculated a p-value for the test statistic against the Chi-squared distribution with one degree of  
 1071 freedom. To correct for multiple hypothesis testing, we performed one permutation in which cell  
 1072 state scores were permuted across all cells per pathway tested, and we obtained a null LRT p-value  
 1073 distribution using the same framework as above with our permuted data. We then calculated q-

1074 values for the cell state-genotype interaction term using the empirical p-value distribution across  
1075 all tested eQTL using the empPvals and qvalue functions from the qvalue package (v2.16.0)<sup>74</sup>.

1076

1077 **Colocalization of GWAS and eQTL signals.** Specifically for colocalization analyses, eQTL were  
1078 remapped in each cell type-disease state pair with Matrix eQTL<sup>69</sup> using a 1 megabase (Mb) *cis*-  
1079 window, with all other modeling parameters kept constant, to broaden our search space and  
1080 increase our probability of detecting colocalized variants. We assessed colocalization between our  
1081 identified eQTLs in each cell type-disease state pair and the COVID-19 GWAS meta-analyses of  
1082 European-ancestry subjects from the COVID-19 Host Genetics Initiative (HGI)<sup>11</sup> release 7  
1083 (<https://www.covid19hg.org/results/r7/>). We tested two outcomes: “critical illness” and  
1084 “hospitalization” (named A2 and B2, respectively by the COVID-19 HGI). A Bayesian analysis  
1085 was implemented using the coloc (v5.1.0.1)<sup>75</sup> R package with default settings to analyze all  
1086 variants in the 1 Mb genomic locus centered on the lead eQTL in the single-cell data. We only  
1087 considered GWAS loci with associations below  $1 \times 10^{-4}$ . We defined colocalization as  $PP4 > 0.8$ ,  
1088 where PP4 corresponds to the posterior probability of colocalization between eQTL and GWAS  
1089 signals. Colocalization was visualized using the R package LocusCompareR (v1.0.0)<sup>76</sup> with  
1090 default parameters, except for the genome parameter which was set to "hg38". LD  $r^2$  with the lead  
1091 SNP was calculated using the default "EUR" population.

1092

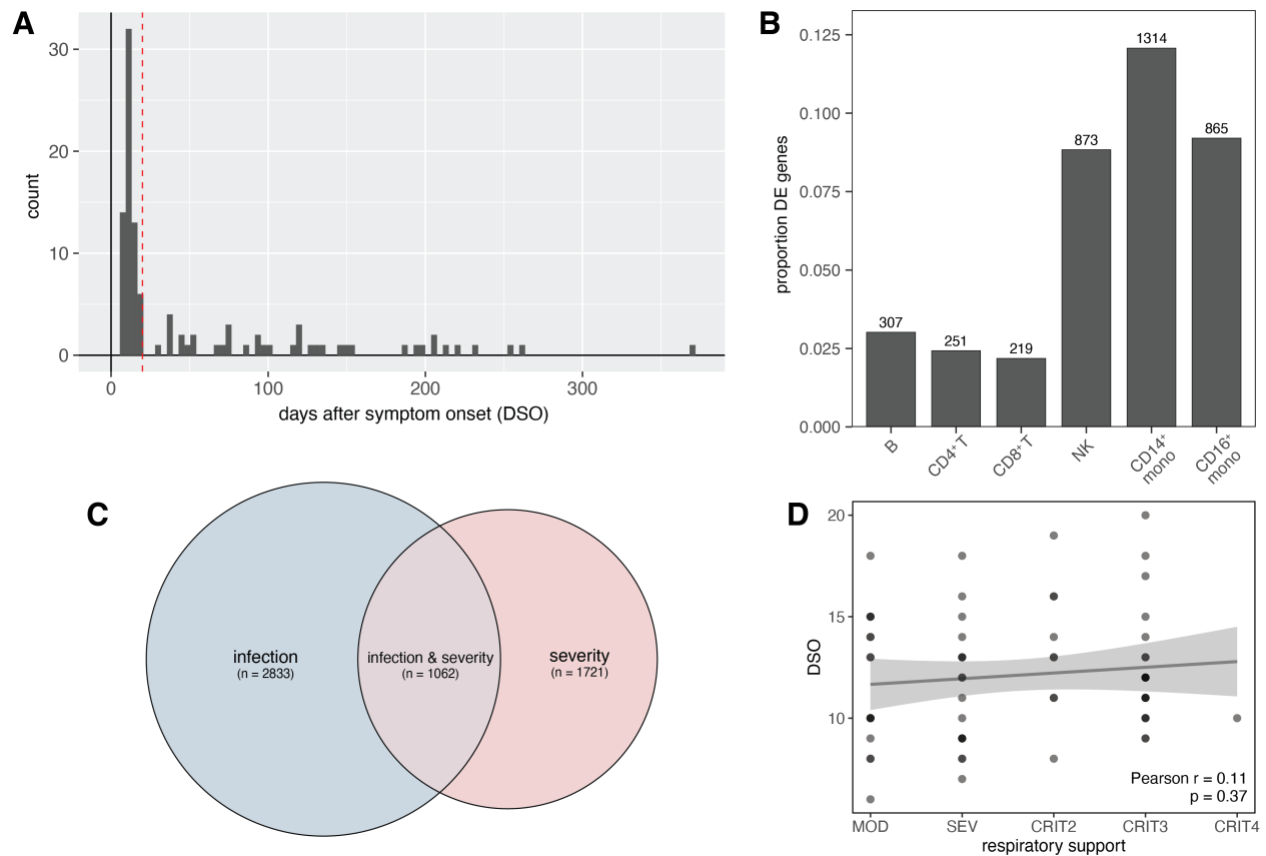

1093

1094 **Fig. S1. Sampling time points and global SARS-CoV-2 infection effects.** (A) Distribution of

1095 days since symptom onset (DSO) at the time of sample collection across acute and convalescent

1096 COVID-19 patients in our cohort. Samples were considered to be in the acute phase of infection if

1097  $DSO \leq 20$  (red line), and samples with  $DSO > 20$  were considered follow-ups. (B) Numbers and

1098 proportions (y-axis) of genes significantly differentially expressed ( $|\log_2FC| > 0.5$ ,  $FDR < 0.05$ ) in

1099 COVID-19 patients compared to healthy controls. (C) Overlap between the set of significantly

1100 differentially expressed genes upon infection (blue circle, left) and the set of genes significantly

1101 correlated with disease severity (red circle, right). (D) Correlation between respiratory support

1102 score and days since symptom onset (DSO). P-value and best-fit slope were determined from a

1103 linear regression model correcting for dataset.

1104

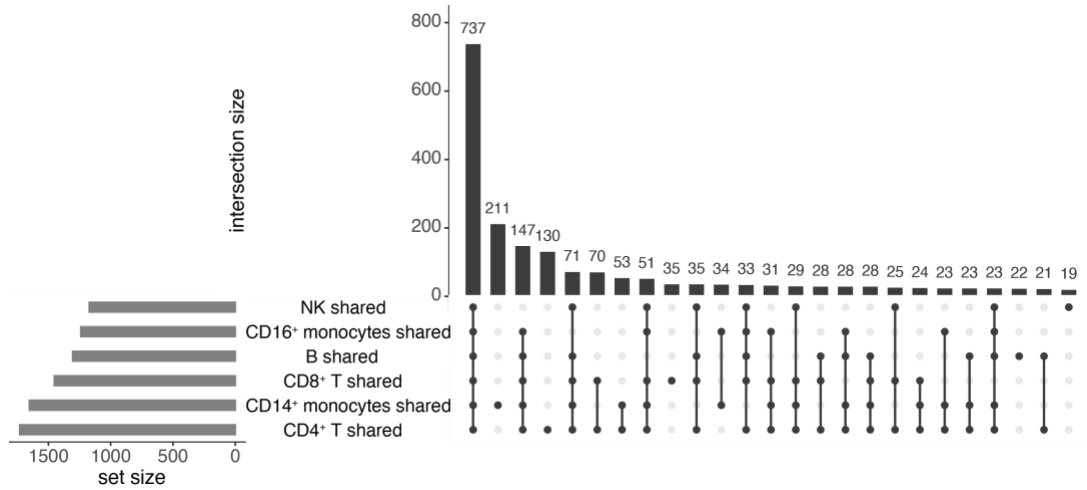

1105

1106 **Fig. S2. Sharing patterns among disease-state-shared eGenes.** Significant eGene sharing

1107 patterns among disease-state-shared eGenes ( $lfsr_{CTL} < 0.1$  and  $lfsr_{COVID} < 0.3$  or  $lfsr_{COVID} < 0.1$  and

1108  $lfsr_{CTL} < 0.3$ ) in healthy controls and COVID-19 patients across cell types.

1109

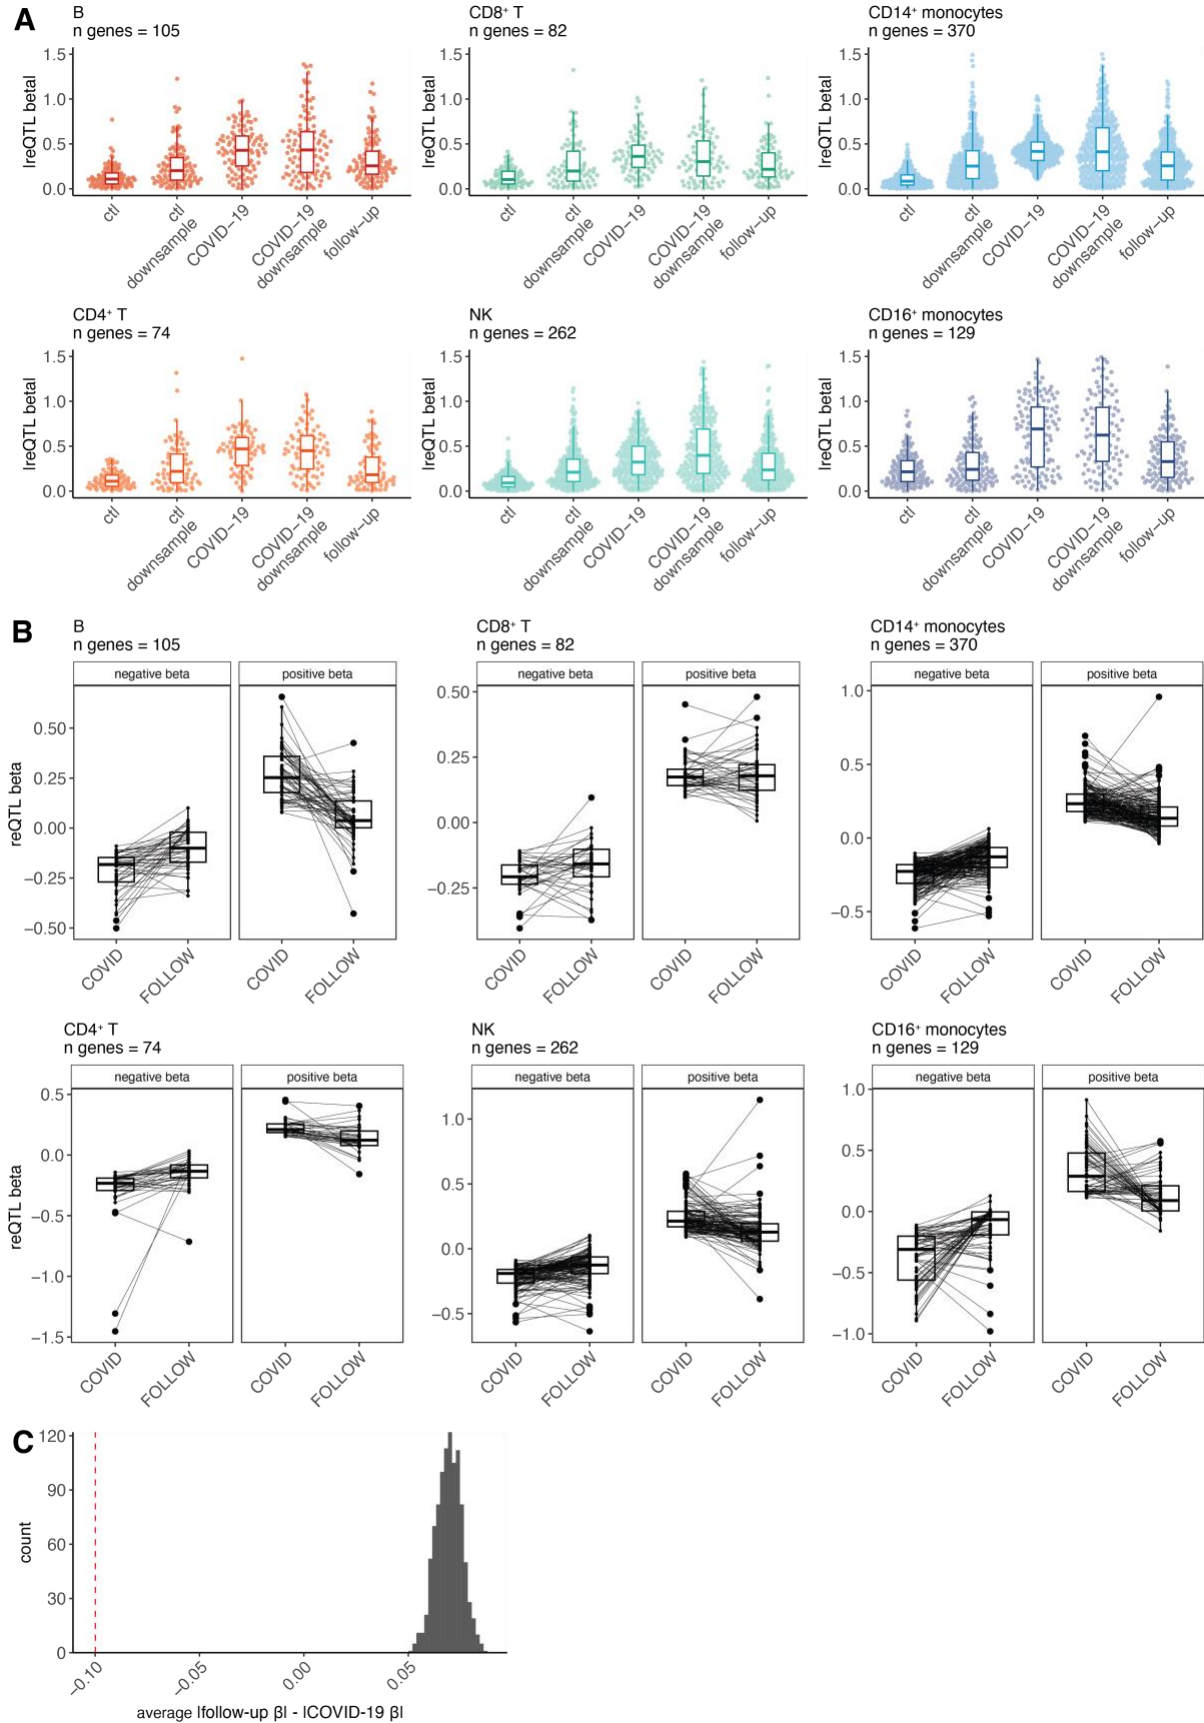

1111 **Fig. S3. Cell type-specific response eQTL patterns.** (A) Distribution of effect sizes for the cell  
1112 type-specific reQTL sets plotted across cell types in healthy controls (“ctl”), patients (“COVID-  
1113 19”), and follow-ups (“follow-up”) for the full sample set, as well as a downsampled set in the  
1114 control (“ctl downsample”) and patient (“COVID-19 downsample”) groups. Downsampled sets  
1115 mirrored the follow-up data structure ( $n = 26$  samples) and were derived as follows: i) for controls,  
1116 26 individuals were randomly sampled from the control group, and ii) for patients, the 21 follow-  
1117 up individuals with a corresponding acute infection time point sample were included. Here, all  
1118 eQTL effect sizes are taken directly from Matrix eQTL (i.e., prior to running mash). (B) Paired  
1119 reQTL effect sizes in COVID-19 patients (“COVID”) and follow-ups (“FOLLOW”) across cell  
1120 types. The change in effect size for each gene from patient to follow-up samples is plotted as a  
1121 black line. (C) The observed mean  $\Delta$  response magnitude across the 370 CD14<sup>+</sup> monocyte-specific  
1122 reQTL (red dotted line) compared to the null expectation when permuting random sets of shared  
1123 eGenes of the same size ( $n = 370$ ) and computing their mean ( $n$  permutations = 1,000, null shown  
1124 in gray). The observed mean is significantly lower ( $p < 0.001$ ) than random expectation.  
1125

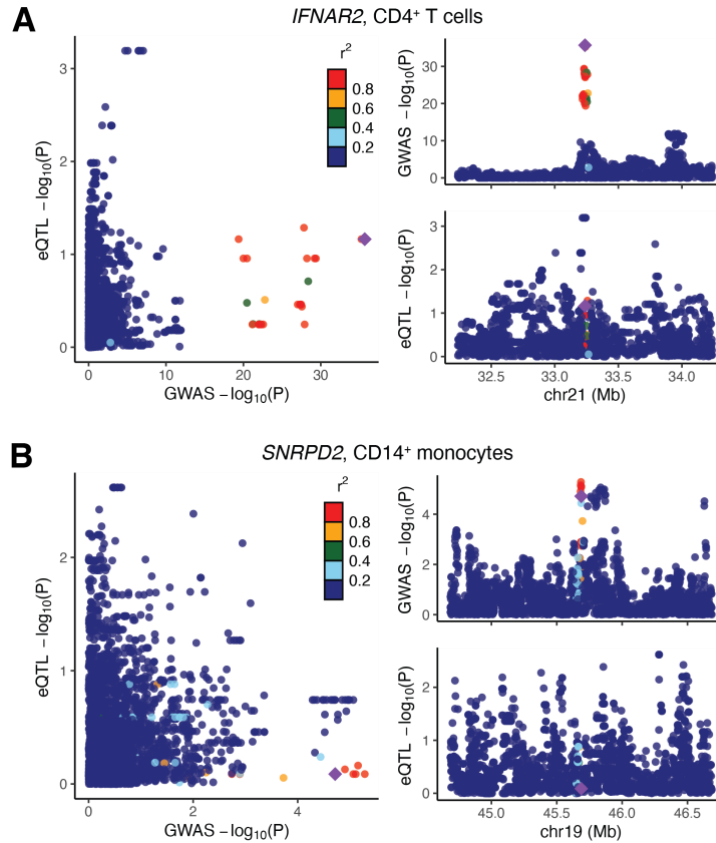

1126

1127 **Fig. S4. Colocalization patterns in COVID-19 follow-up samples. (A)** The colocalization signal  
1128 for the lead SNP rs9636867 (*IFNAR2*, CD4<sup>+</sup> T cells, GWAS: hospitalization due to severe COVID-  
1129 19) is absent in follow-ups. **(B)** The colocalization signal for the lead SNP rs7246757 (*SNRPD2*,  
1130 CD14<sup>+</sup> monocytes, GWAS: hospitalization due to severe COVID-19) is absent in follow-ups. For  
1131 both **(A)** and **(B)**, the larger plot on the left shows the correlation between GWAS p-values (x-  
1132 axis) and eQTL p-values (y-axis) in follow-ups. Smaller plots on the right show Manhattan plots  
1133 for the GWAS signal (top) and the eQTL signal in follow-ups (bottom). The lead SNP is depicted  
1134 as a purple diamond.

1135 **Table S8. Gene expression principal components (PCs) regressed in the pseudobulk eQTL**

1136 **analysis.** PCs regressed and number of significant eQTL per cell type and disease state are

1137 reported.

| Cell type                                   | N Regressed PCs |                 |                  | N genes < 0.10 FDR, Matrix eQTL |                 |                  |
|---------------------------------------------|-----------------|-----------------|------------------|---------------------------------|-----------------|------------------|
|                                             | <i>Control</i>  | <i>COVID-19</i> | <i>Follow-up</i> | <i>Control</i>                  | <i>COVID-19</i> | <i>Follow-up</i> |
| <i>CD14<sup>+</sup></i><br><i>monocytes</i> | 1 to 3          | 1 to 14         | 1 to 2           | 430                             | 1286            | 56               |
| <i>CD16<sup>+</sup></i><br><i>monocytes</i> | 1               | 1               | 1                | 10                              | 49              | 6                |
| <i>CD4<sup>+</sup> T</i>                    | 1 to 10         | 1 to 4          | 1 to 2           | 1665                            | 730             | 77               |
| <i>CD8<sup>+</sup> T</i>                    | 1 to 12         | 1 to 13         | 1 to 3           | 424                             | 274             | 25               |
| <i>B</i>                                    | 1 to 5          | 1 to 8          | 1                | 285                             | 192             | 9                |
| <i>NK</i>                                   | 1 to 13         | 1 to 6          | 1 to 2           | 74                              | 230             | 9                |

1138
